# Supplementary material for: Identification of spatial co-expression patterns and intra-tissue heterogeneity in spatially resolved transcriptomics by region-specific denoising
Source: Research Square preprint supplement (doi:10.21203/rs.3.rs-647777/v1), 2021-11-08
Supplement: Supplementary file 1 [file 7ef545dc92c32a6955965dfe.docx]

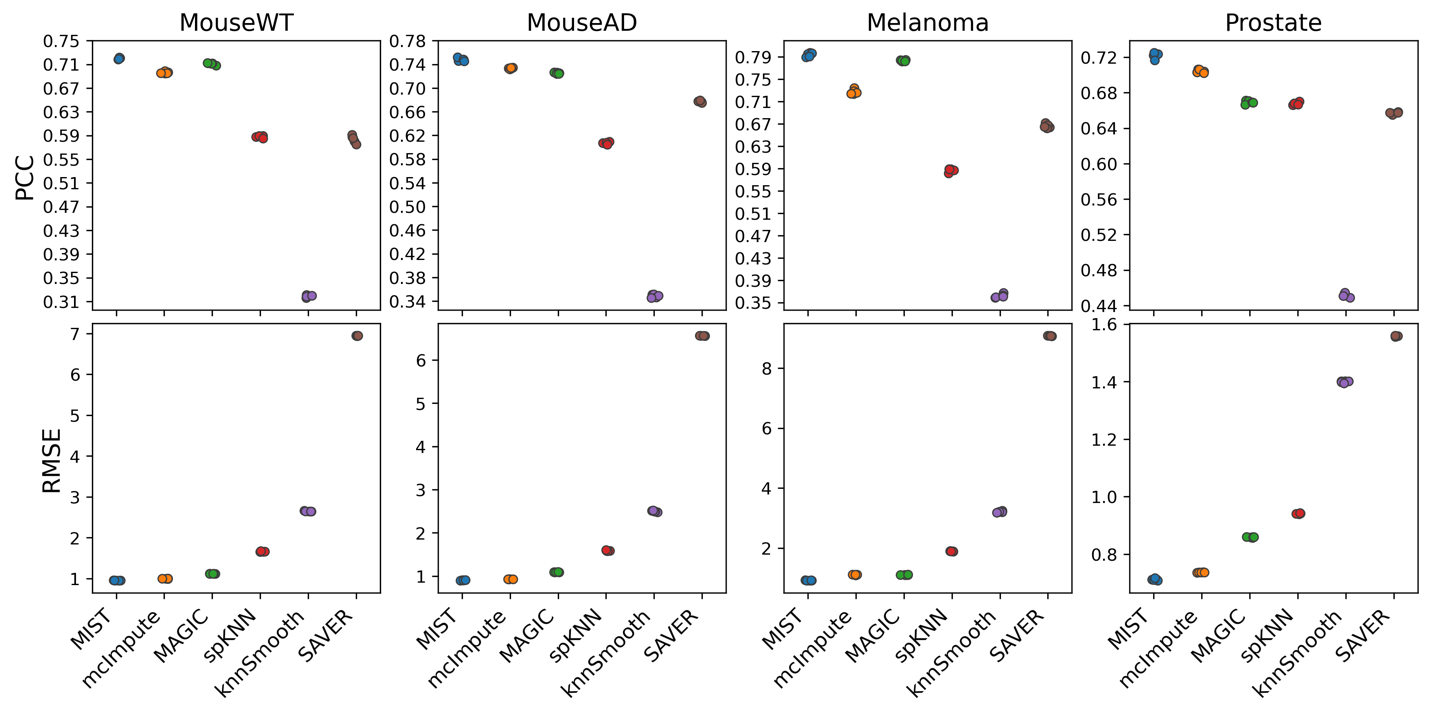


**a**

**b**

**Extended Figure 3.1** | **Holdout test performance. a-b,** Holdout experiment performance across multiple data sets using metrics **a,** PCC and **b,** RMSE. Each column is an individual data set. Points in the same color indicate the 5 non-overlap fold of tests for each model.

**a**

**b**


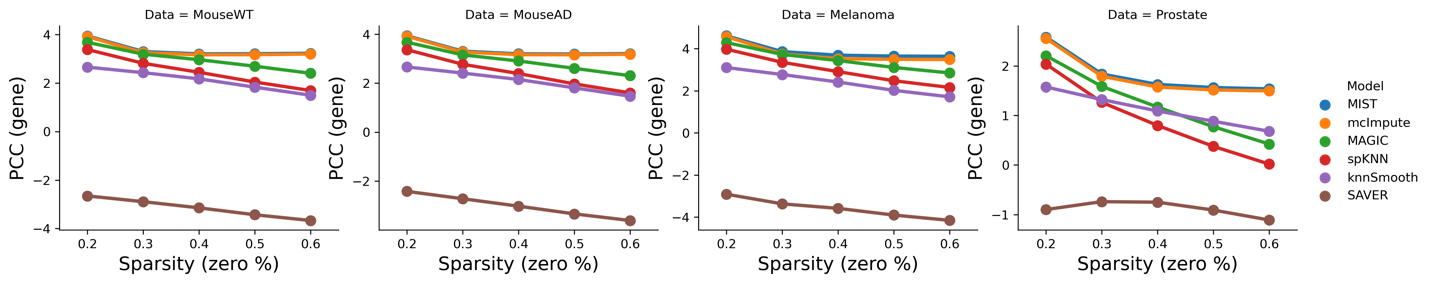

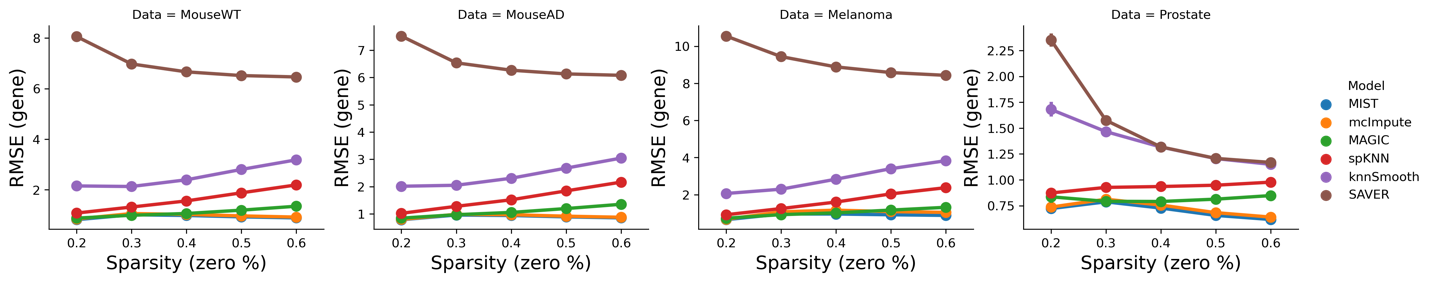


**Extended Figure 3.2** | **Gene-level holdout test performance. a.** RMSE (y-axis) for every gene as a function of gene sparsity (x-axis). b. PCC for every gene as a function of gene sparsity.

**Extended Figure 3.3 | MIST recovered gene expression patterns in holdout experiments.** Column 1 is the spatial pattern of the input to MIST with random non-zero values held out. Column 2 is the denoised gene expression pattern. Column 3 is the original observed gene expression pattern. Column 4 shows the correlation between input values and observed values. Column 5 shows the correlation between the denoised expression values and the observed expression values. **a,** Expression patterns recovered for gene *Gm29216* in the Mouse WT brain. **b,** Expression patterns recovered for gene mt-Rnr1 in the Mouse AD brain. **c,** Expression patterns recovered for gene *Gm29216* in the Prostate sample.


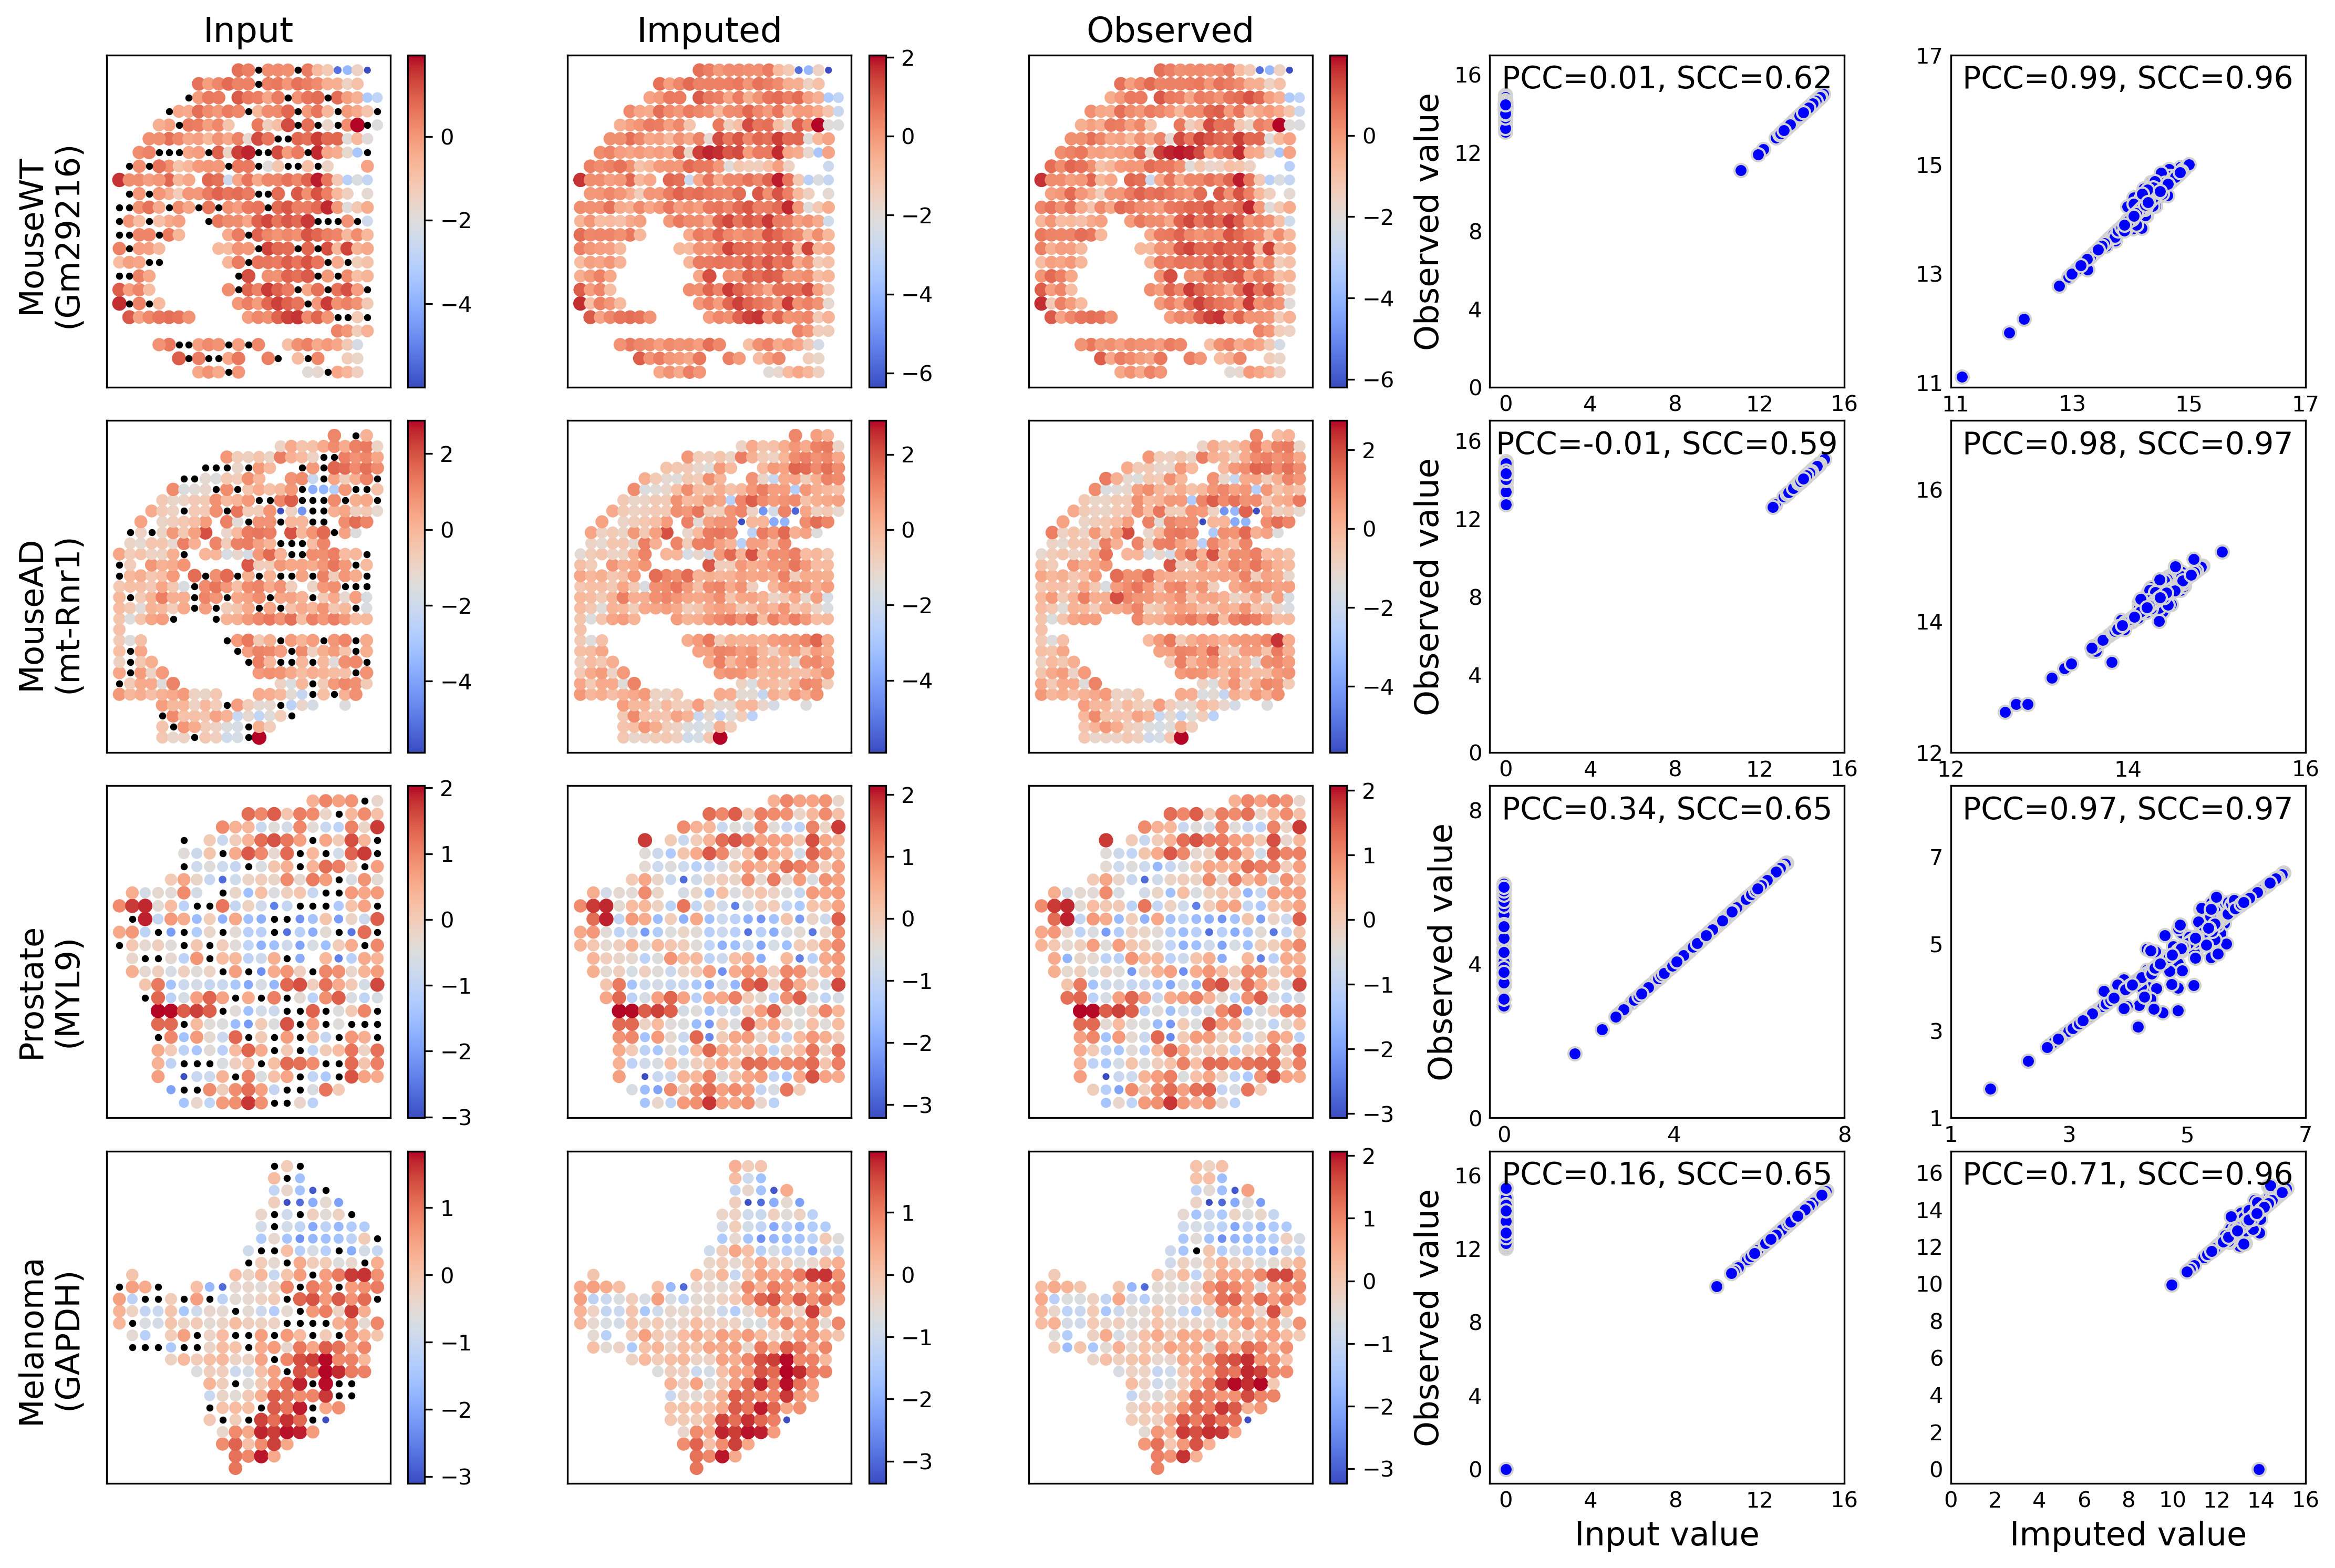


Input value

Denoised value

**a**

**b**

**c**

**Extended Figure 3.4 | Distribution of improved PCC and SCC in holdout experiments. a,** PCC distribution of HO vs. Observed non-zero gene expression. **b,** PCC distribution of denoised vs. Observed non-zero gene expression. **c,** Distribution of improved PCC for nonzero values of each held out gene. **d,** SCC distribution of HO vs. Observed non-zero gene expression. **e,** SCC distribution of denoised vs. Observed non-zero gene expression. **f,** Distribution of improved SCC for nonzero values of each held out gene.


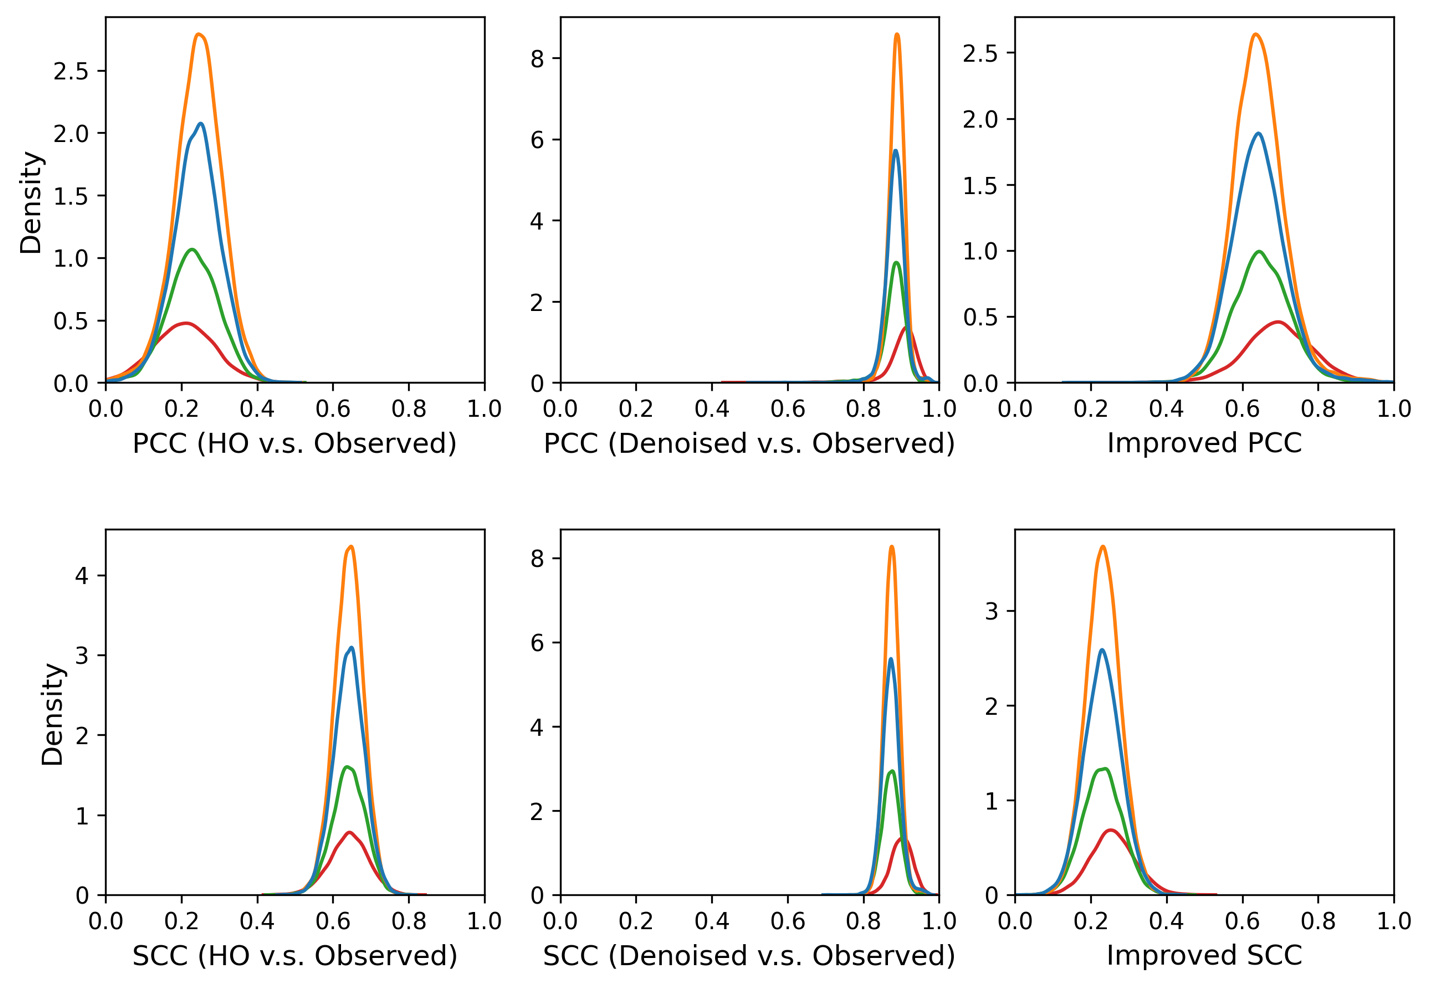


**a**

**b**

**c**

**d**

**e**

**f**


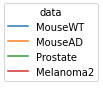


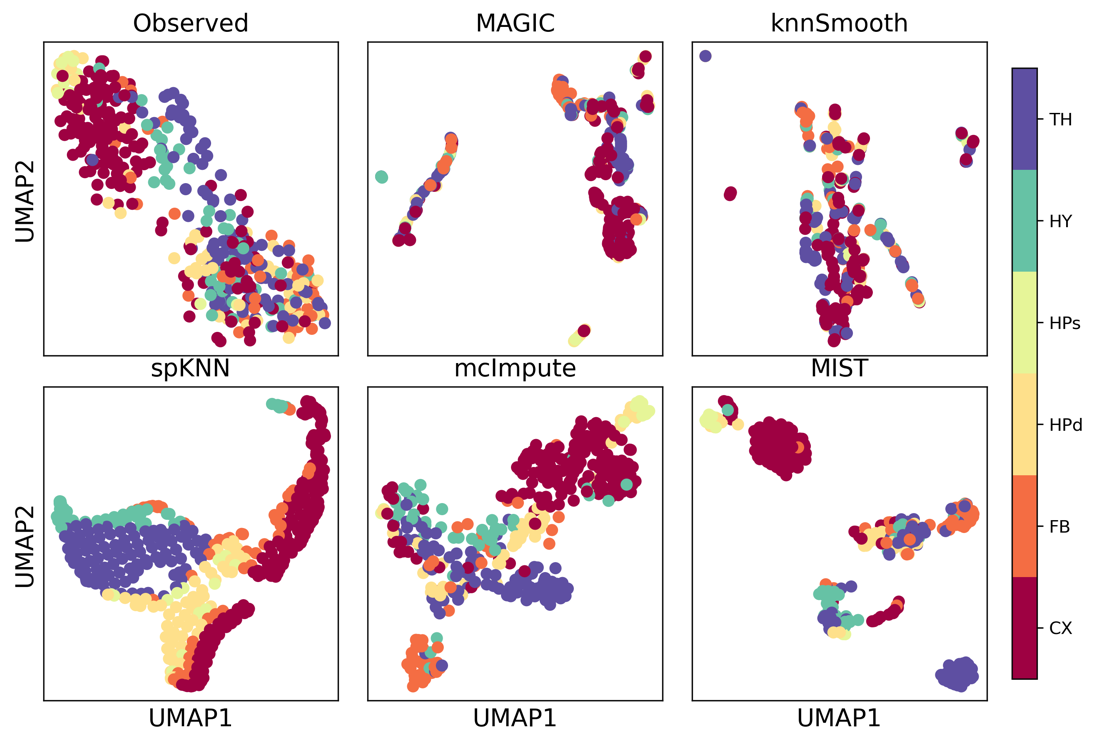


**Extended Figure 4.1 | UMAP visualization of Mouse WT brain using data denoised by different algorithms.**


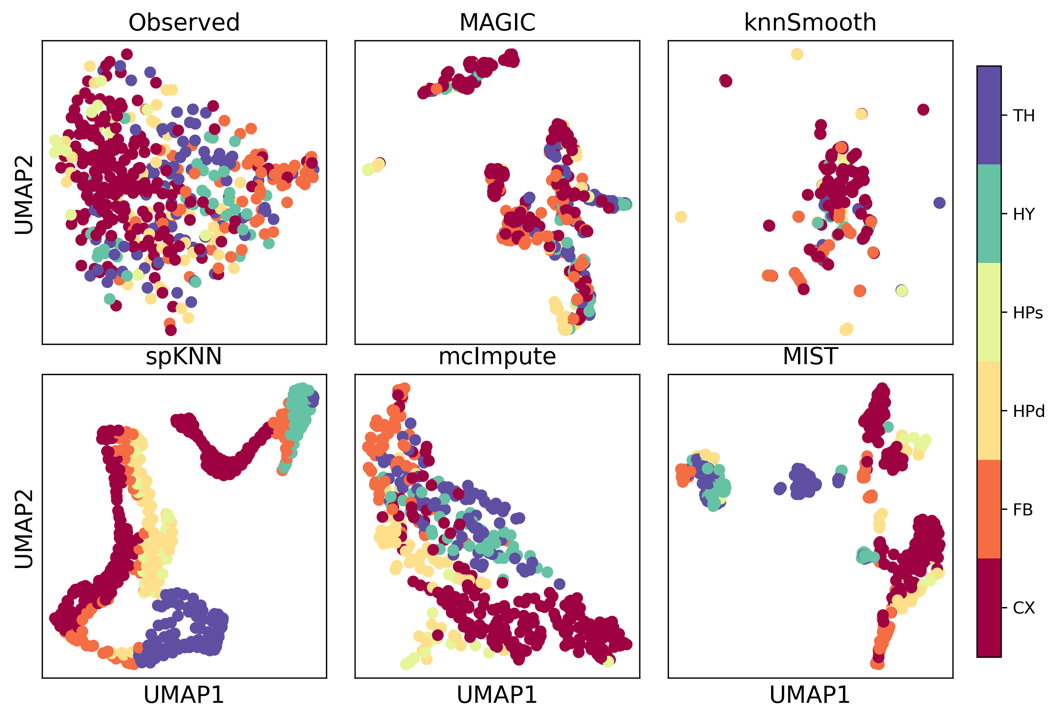


**Extended Figure 4.2 | UMAP visualization of Mouse AD brain using data denoised by different algorithms.**


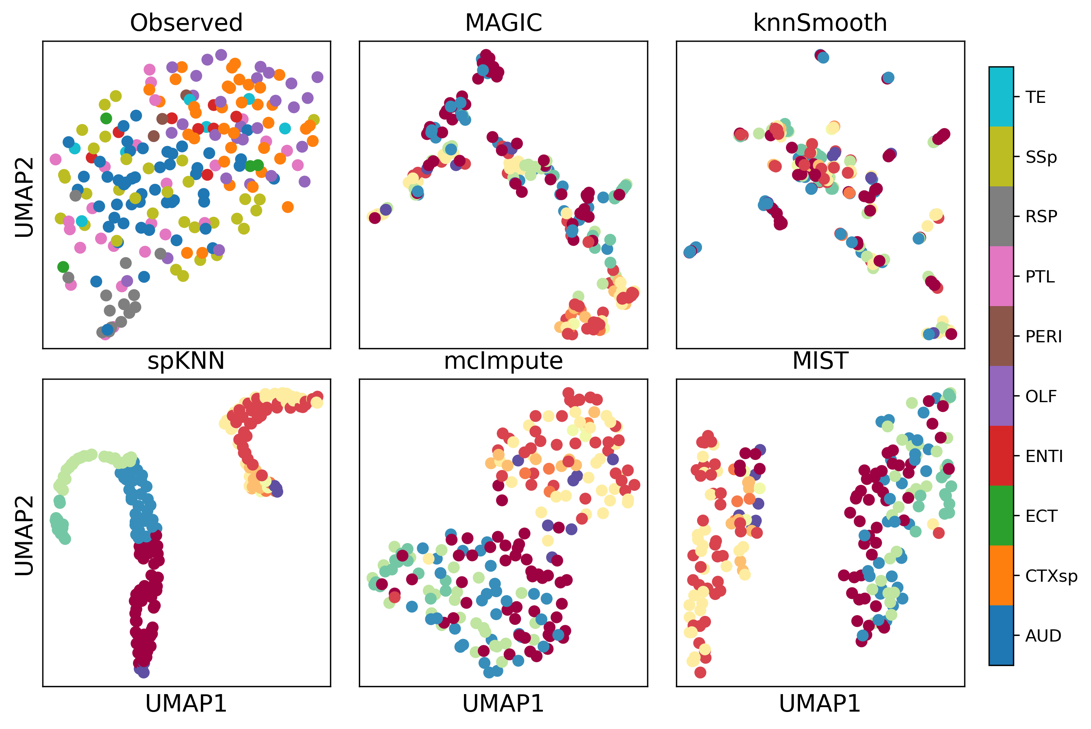


**Extended Figure 4.3 | UMAP visualization of Mouse AD Cortex using data denoised by different algorithms.**


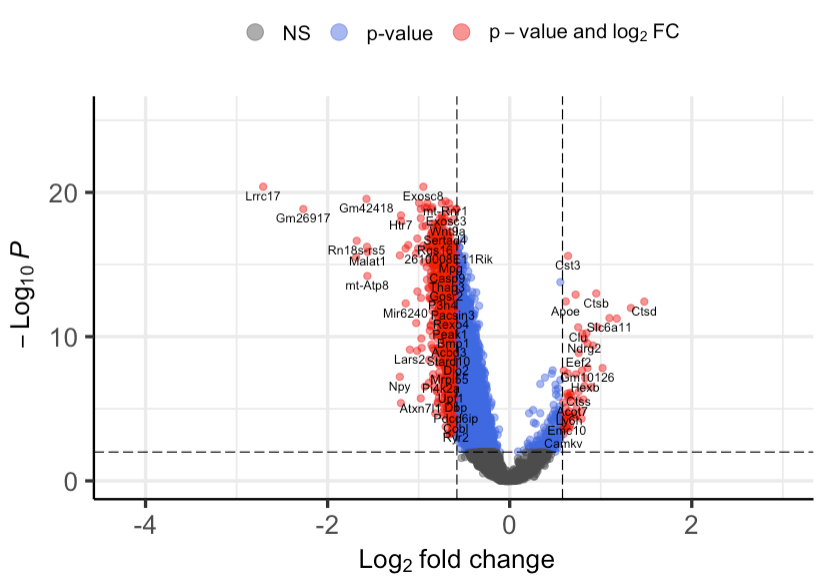

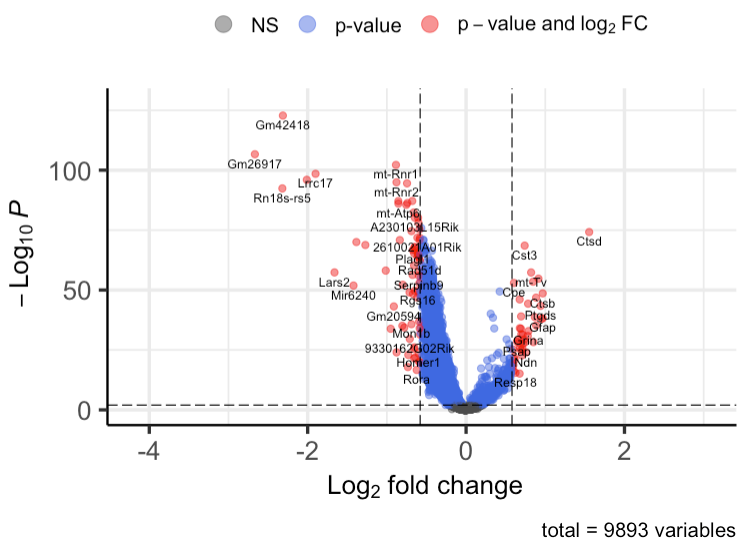


**b**

**a**

**Extended Figure 4.4 | Volcano plots of AD vs. WT differential expression analysis. a,** Volcano plot of differential gene expression analysis results comparing AD vs. WT mouse brain using Cluster 1 MIST-denoised data. Red dots are significant genes with absolute LFC > 0.58 and FDR < 0.01. **b,** Volcano plot of differential gene expression analysis results comparing AD vs. WT mouse brain using Cluster 2 samples.


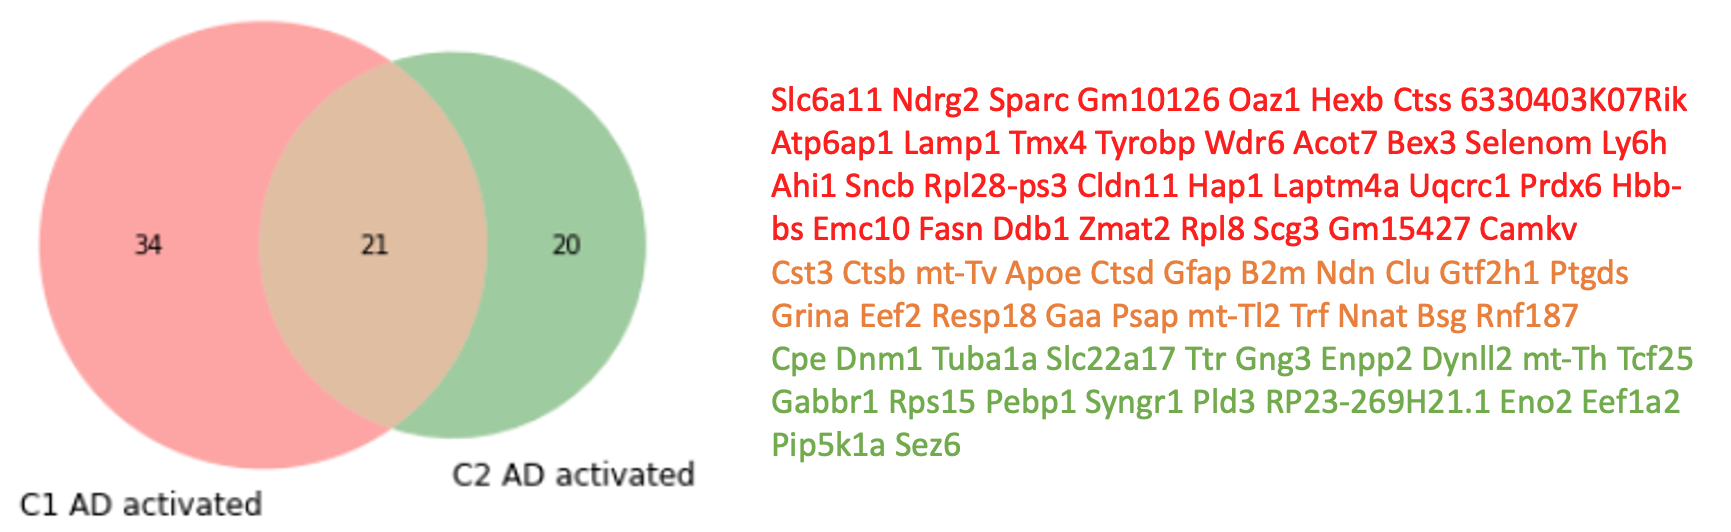
**Extended Figure 4.5 | Consensus and difference of AD activated genes between spatial cortex clusters.** Circle and gene symbols in red color indicate genes that are only activated in Cluster 1 (C1, CTXsp, OLF, ENTI, TE, ECT and PERI). Circle and gene symbols in green are genes that are only activated in Cluster 2 (C2, AUD, PTL, RSP, SSp). Orange color indicates AD activated genes that are shared across these two spatial cortex clusters.


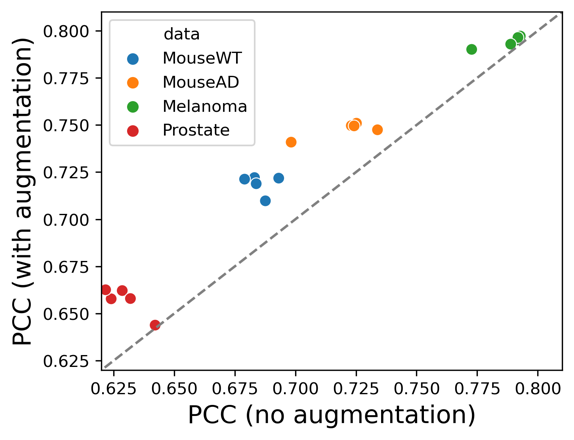

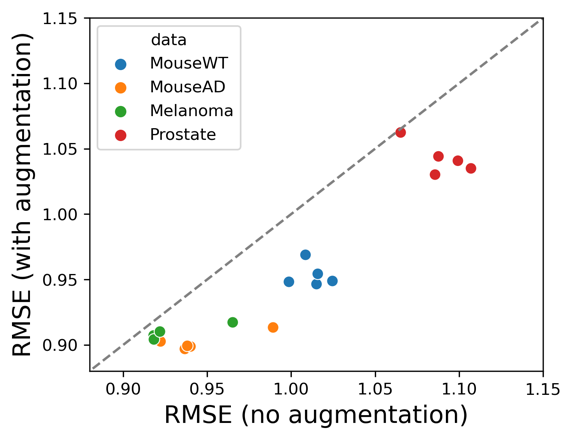


**a**

**b**

**Extended Figure 6. | Region augmentation improved MIST’s performance.** Scatter plots showing paired performance comparing before augmentation (x-axis) and after augmentation (y-axis) in terms of (a) PCC and (b) RMSE. Every point represents a hold-out experiment colored by samples.
